# Supplementary material for: Regulated Induced Proximity Targeting Chimeras (RIPTACs): a Novel Heterobifunctional Small Molecule Therapeutic Strategy for Killing Cancer Cells Selectively
Source: PubMed Central journal article supplement — bioRxiv. 2023 Jan 2:2023.01.01.522436. Preprint. [Version 1] doi: 10.1101/2023.01.01.522436 (PMC9881854; doi:10.1101/2023.01.01.522436), 2023-01-02
Supplement: NIHPP2023.01.01.522436V1-supplement-1.pdf [file NIHPP2023.01.01.522436V1-supplement-1.pdf]

A)

| Effector Ligand                | BI-2536  |          | Dinaciclib |
|--------------------------------|----------|----------|------------|
| Target                         | HaloTag  | FKBP     | HaloTag    |
| RIPTAC                         | HLDA-131 | HLDA-231 | HLDA-119   |
| 293_GFPL GI <sub>50</sub> (μM) | 3.442    | >10      | 4.090      |
| 293_HFL GI <sub>50</sub> (μM)  | 0.007    | 0.069    | 0.021      |
| Fold-Shift                     | 492      | 145      | 195        |

C)

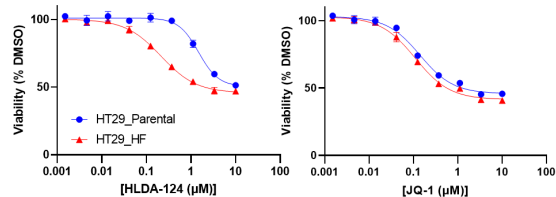

B)

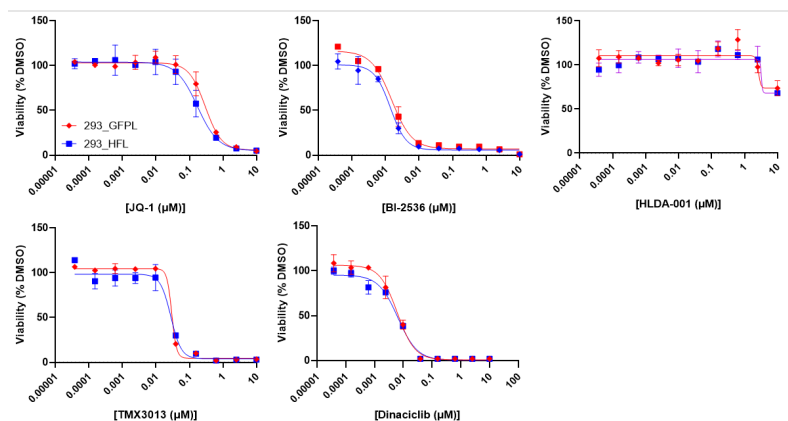

D)

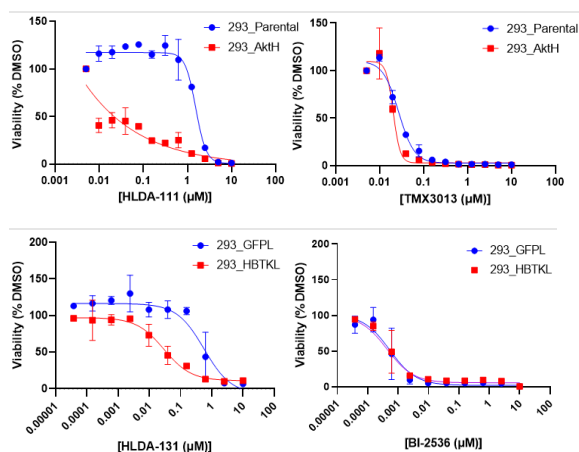

**Supplementary Fig. 1** a) Differential anti-proliferative activity of RIPTACs incorporating BI-2536 and dinaciclib ELs in 293\_HFL cells under 4h pulse/7 day chase conditions in a CellTiterGlo assay. b) ELs and the FKBP ligand HLDA-001 show no differential anti-proliferative activity in 293\_HFL cells in a 7 day CellTiterGlo assay. c) Differential biology observed with the covalent JQ1-CA RIPTAC HLDA-124 in a 3 day CellTiterGlo assay in HT29\_HFL cells that express the HaloTag-FKBP target protein. d) Differential anti-proliferative activity observed in a 5 day CellTiterGlo assay with the TMX3013-CA RIPTAC HLDA-111 in 293\_AktH cells overexpressing Akt1-HaloTag but not the TMX3013 EL. Similarly, differential anti-proliferative activity observed in a 5 day CellTiterGlo assay with the BI2536-CA RIPTAC HLDA-131, but not with BI2536 alone, in the HaloTag-BTK-overexpressing 293\_HBTKL cells compared to 293\_GFPL cells.

A)

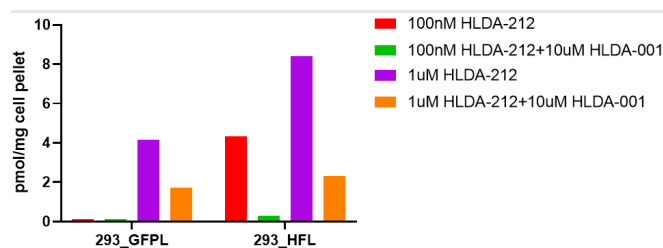

B)

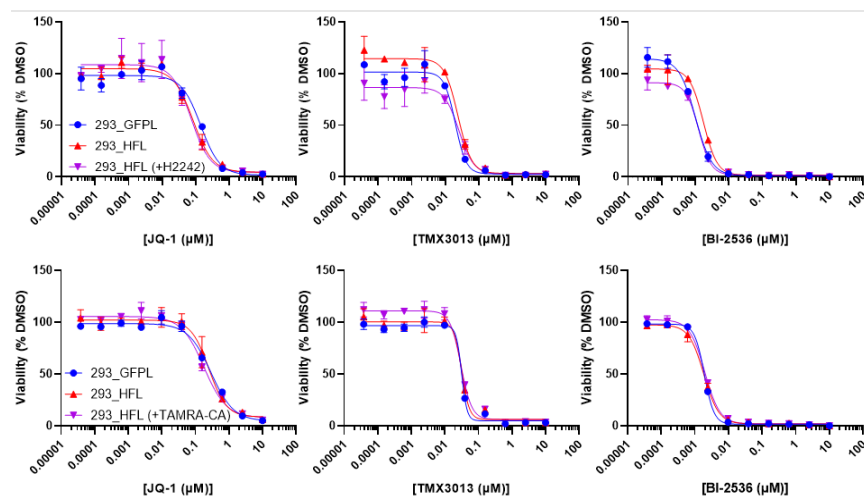

C)

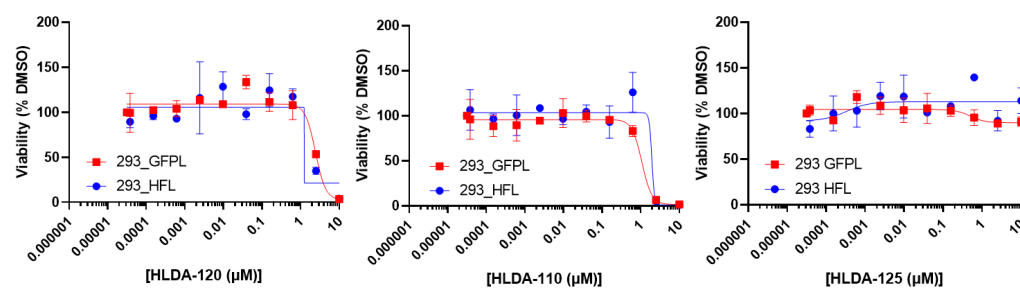

D)

E)

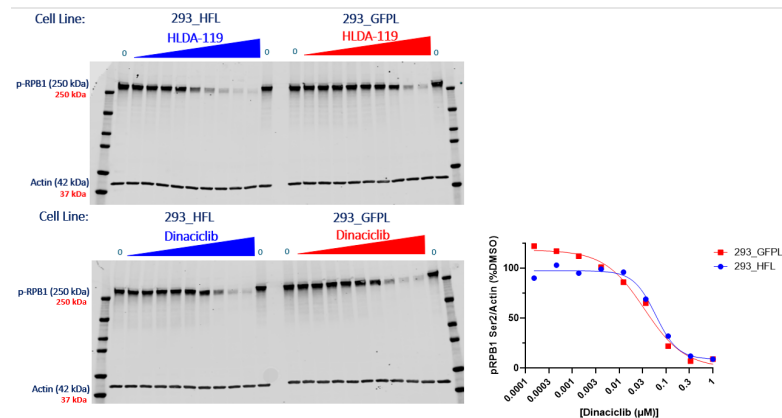

**Supplementary Fig. 2** a) Pre-treatment with 10 $\mu$ M FKBP ligand HLDA-001 abrogates intracellular accumulation of RIPTAC HLDA-212. b) ELs JQ1, TMX3013, and BI2536 are equipotent in 293\_GFPL and 293\_HFL cells and show no reduction in potency upon pre-treatment of 293\_HFL cells with either 10 $\mu$ M FKBP ligand HLDA-001 or 300nM HaloTag ligand TAMRA-CA. c) HLDA-120 and HLDA-110, des-chloro negative controls for JQ1-CA HLDA-124 and TMX3013-CA HLDA-111 respectively, are equipotent in 293\_GFPL and 293\_HFL cells. d) HLDA-125, a negative control RIPTAC, that cannot bind BRD2/3/4, shows no differential potency in 293\_HFL cells. e) Dinaciclib is equipotent in 293\_GFPL and 293\_HFL cells, as determined by its effect on phospho-RPB1 CTD Ser2 levels in cells.

A)

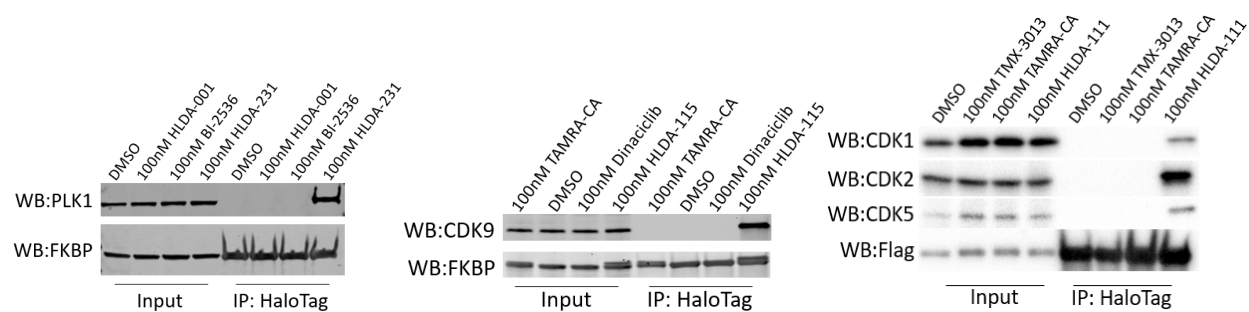

B)

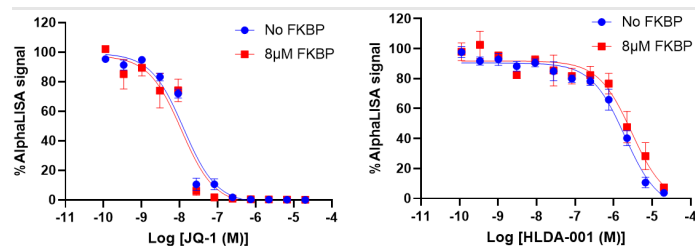

C)

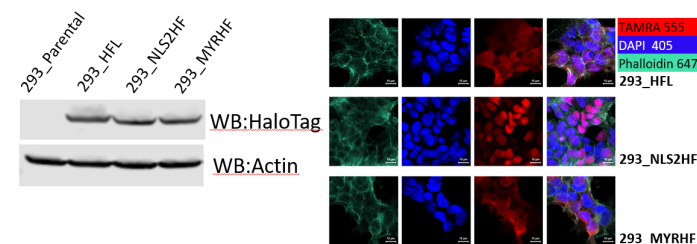

D)

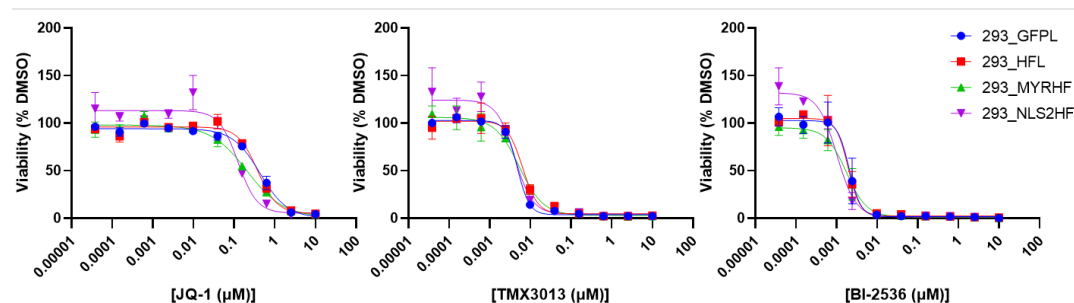

**Supplementary Fig. 3** a) Ternary complex formation observed with PLK1 by treating 293\_HFL cells with the BI2536 containing non-covalent RIPTAC HLDA-231, with CDK9 by treating with the dinaciclib-CA RIPTAC HLDA-115, and with CDK1/2/5 with the TMX3013-CA RIPTAC HLDA-111. No complex formation is observed with EL and TL controls. b) No positive co-operativity observed in AlphaLISA with TL HLDA-001 or EL JQ1. c) Expression levels of HaloTag-FKBP by immunoblotting and localization by confocal microscopy in 293-NLS2HF and 293\_MYRHF cells compared to 293\_HFL cells. d) ELs are equipotent across 293\_HFL, 293-NLS2HF, and 293\_MYRHF cells in a 7-day CellTiter Glo assay.

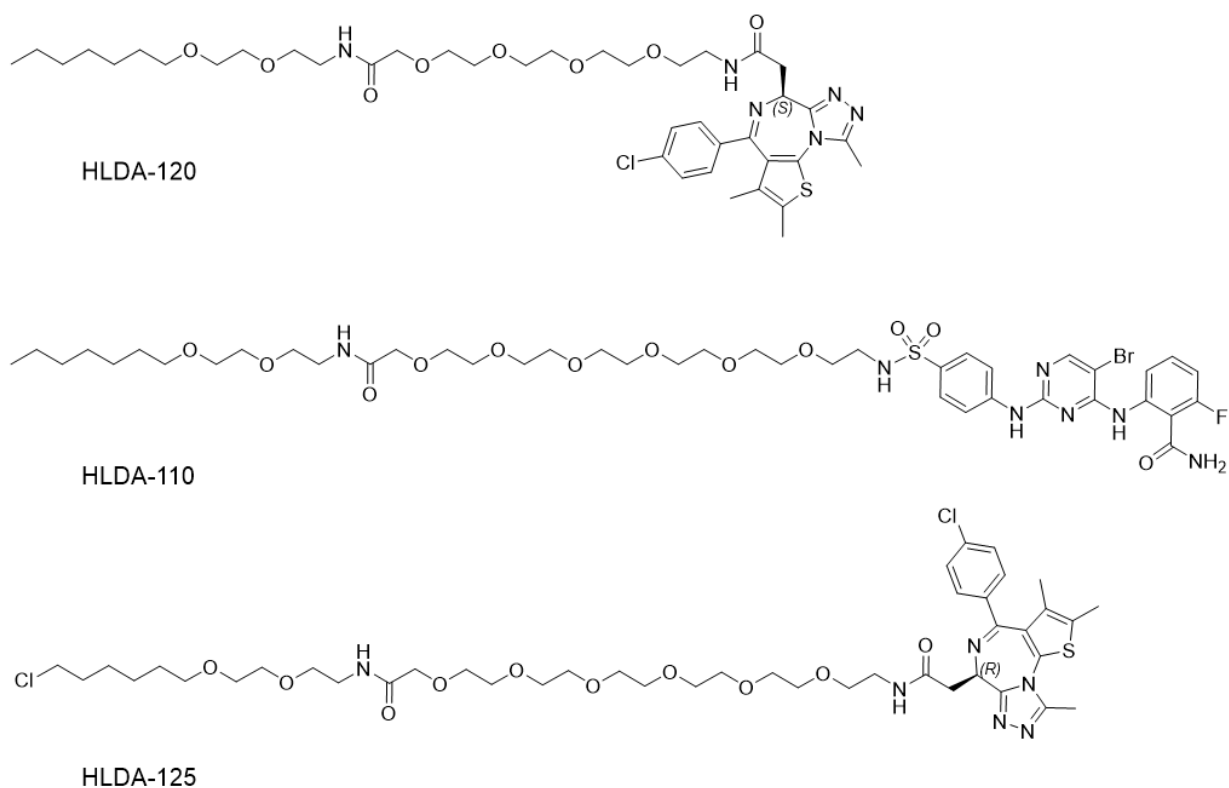

**Supplementary Fig. 4 a)** Structures of negative control compounds HLDA-120, HLDA-110, and HLDA-125
